# Supplementary material for: National trends in the prevalence of chronic kidney disease among Korean adults, 2007–2020
Source: Springer Nature journal article supplement (doi:10.1038/s41598-023-33122-1), 2023-04-10

# **National trends in the prevalence of chronic kidney disease among Korean adults, 2007-2020**

Running Head: National prevalence of chronic kidney disease among Korean adults

Soo-Young Yoon,<sup>1 ||</sup> Hye won Park,<sup>2</sup> Hyeon Jin Kim,<sup>2 ||</sup> Andreas Kronbichler,<sup>3</sup> Ai Koyanagi,<sup>4,5</sup> Lee Smith,<sup>6</sup> Jae Il Shin,<sup>7</sup> Sang Youl Rhee,<sup>2</sup> Seung Won Lee,<sup>8,9</sup> Jin Sug Kim,<sup>1</sup>, Hyeon Seok Hwang<sup>1</sup>, Dong Keon Yon<sup>2\*</sup>, Kyunghwan Jeong<sup>1\*</sup>

Supplementary Figure S1. Trends and prevalence of CKD among Korean adults by sociodemographic information, health related lifestyle, and medical condition, 2007-2020. Each panel shows the difference in trends and prevalence of CKD on (A) age, (B) sex, (C) residential area, (D) educational level, (E) household income, (F) BMI, (G) smoking, (H) outpatient clinic visit within two-week from the survey date, and (I) medical condition. CKD: chronic kidney disease; BMI: body mass index.

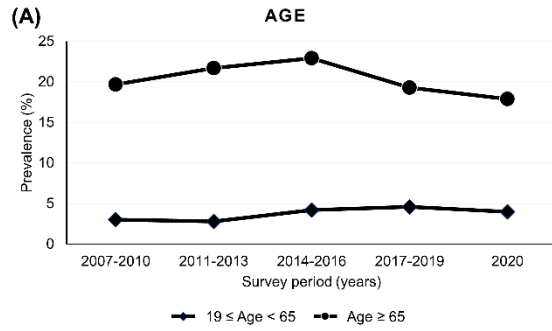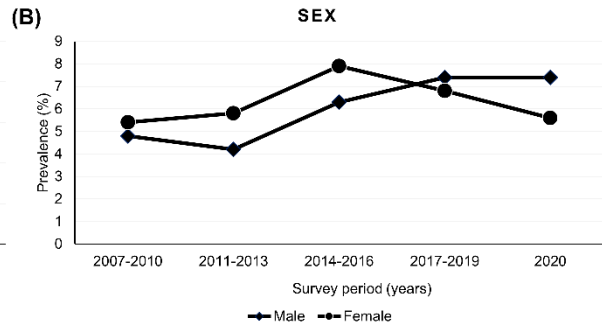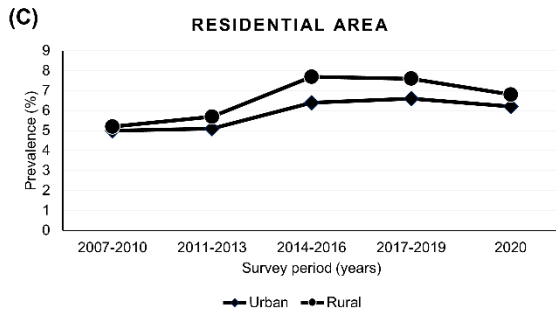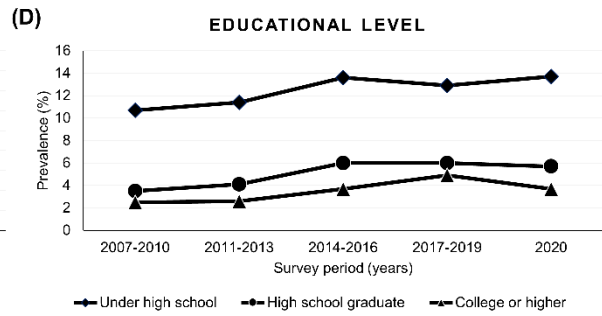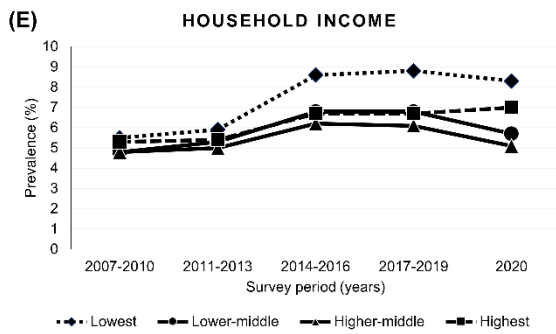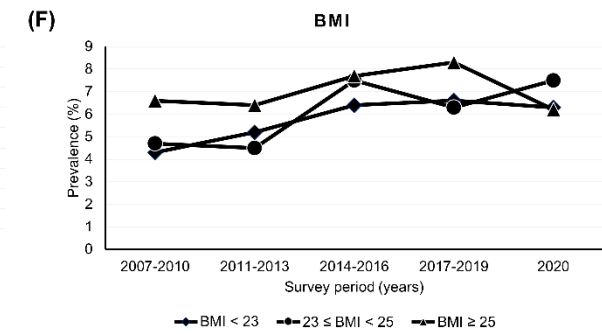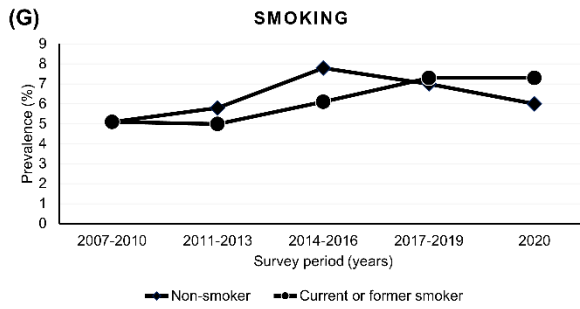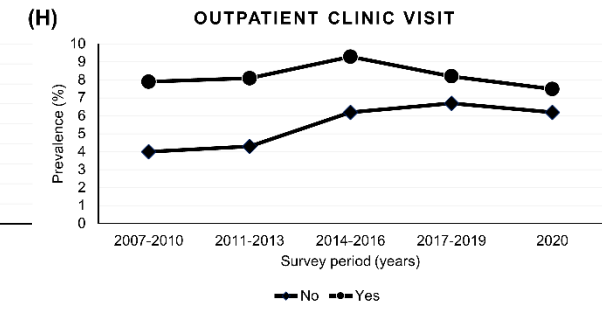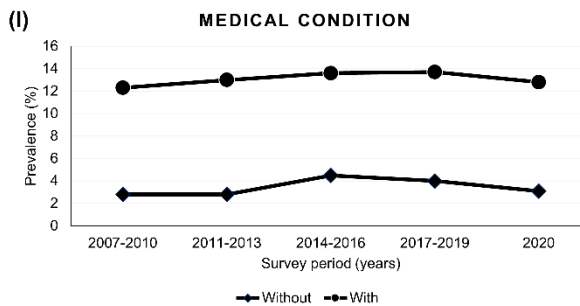

Supplement: MOESM1 [file 41598_2023_33122_MOESM1_ESM.pdf]
